# Supplementary material for: Arrays of triangular shaped pincushions for SERS substrates prepared by using self-organization and vapor deposition
Source: Royal Society of Chemistry journal article supplement (doi:10.1039/b923514k), 2010-01-01

### Supporting information 1

The confocal depth (D) is calculated by using following formula ;

$$\pm D(\mu\text{m}) = \lambda / (2 \times (\text{N.A.})^2)$$

$\lambda$  ; 0.514  $\mu\text{m}$  (laser wavelength)

N.A. ; 0.40 (peculiar of the objective lens)

In our case, D is 1.6  $\mu\text{m}$ .

### Supporting information 2

A tilted SEM image of the silver flat films.

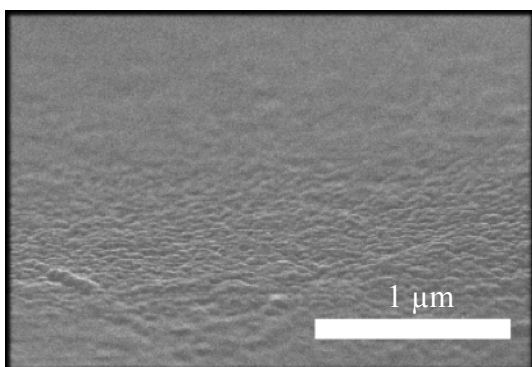

Supplement: b923514k.pdf [file b923514k.pdf]
